# Supplementary material for: Spectroscopic properties of yellow and red InP/ZnSe/ZnS quantum dots
Source: Royal Society of Chemistry journal article supplement (doi:10.1039/d4tc00925h), 2024-01-01
Supplement: d4tc00925h1.pdf [file d4tc00925h1.pdf]

## Supporting Information

### Spectroscopic properties of yellow and red InP/ZnSe/ZnS quantum dots

Yanyan Cui,<sup>a</sup> Qianqian Wu,<sup>b</sup> Junzi Li,<sup>a</sup> Yang Gao,<sup>a</sup> Fan Cao,<sup>b</sup> Xuyong Yang,<sup>\*b</sup> and Tingchao He<sup>\*a</sup>

<sup>a</sup>Key Laboratory of Optoelectronic Devices and Systems of Ministry of Education and Guangdong Province, College of Physics and Optoelectronic Engineering, Shenzhen University, Shenzhen, 518060, China Email: [tche@szu.edu.cn](mailto:tche@szu.edu.cn)

<sup>b</sup>Key Laboratory of Advanced Display and System Applications of Ministry of Education, Shanghai University, 149 Yanchang Road, Shanghai, 200072 P. R. China Email: [yangxy@shu.edu.cn](mailto:yangxy@shu.edu.cn)

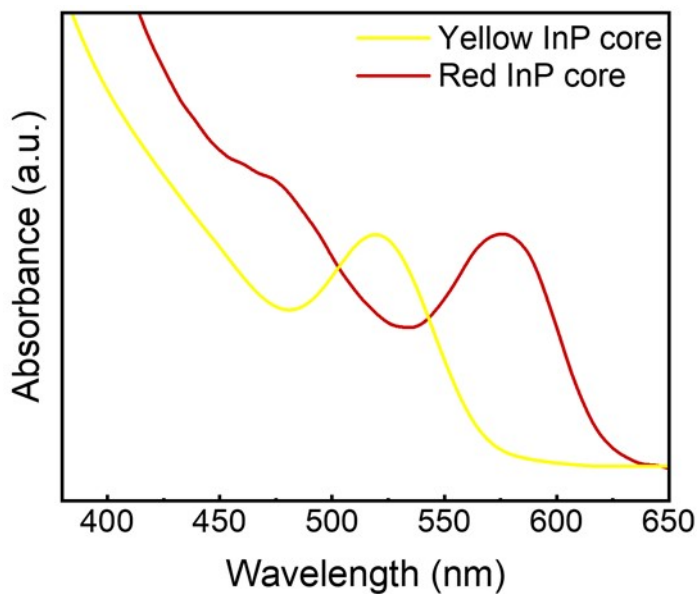

**Figure S1.** UV-visible absorption spectra of InP cores of yellow and red QDs.
